# Supplementary material
Source: HighWire-hosted journal article supplement (https://jnm.snmjournals.org/highwire/filestream/97632/field_highwire_adjunct_files/0/241059_Supplemental_Data.pdf)

Supplemental Figure 1: Surface-based analysis between participants with amyotrophic lateral sclerosis (ALS) and healthy volunteers (HV) using [ $^{11}\text{C}$ -PBR28 (SUVR<sub>40-60</sub> and both tracers combined ( $^{11}\text{C}$ -PBR28 SUVR<sub>40-60</sub> and  $^{18}\text{F}$ -DPA714 SUVR<sub>40-60</sub>)) using whole brain - ventricles as pseudoreference region.

SUVR = standardized uptake value ratio.

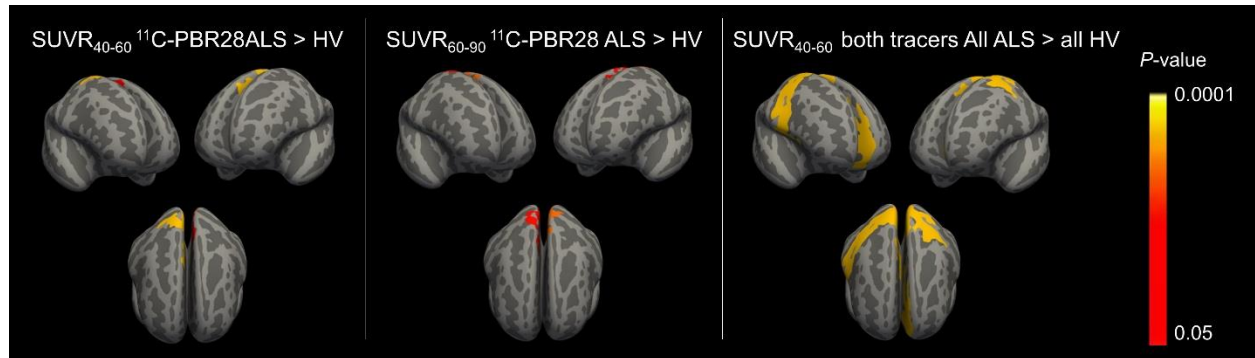

Supplement: 241059_Supplemental_Data.pdf [file 241059_Supplemental_Data.pdf]
